# Supplementary material for: Cardiovascular Harm From Egg Yolk and Meat: More Than Just Cholesterol and Saturated Fat
Source: PubMed Central journal article supplement — J Am Heart Assoc. 2021 Mar 15;10(7):e017066. doi: 10.1161/JAHA.120.017066 (PMC8174346; doi:10.1161/jaha.120.017066), 2021-03-15
Supplement: JAH3-10-e017066-s001.pdf [file JAH3-10-e017066-s001.pdf]

# **Supplemental Material**

## Supplemental References:

1. Carson JAS, Lichtenstein AH, Anderson CAM, Appel LJ, Kris-Etherton PM, Meyer KA, Petersen K, Polonsky T, Van Horn L, American Heart Association Nutrition Committee of the Council on L, Cardiometabolic H, Council on Arteriosclerosis T, Vascular B, Council on C, Stroke N, Council on Clinical C, Council on Peripheral Vascular D and Stroke C. Dietary Cholesterol and Cardiovascular Risk: A Science Advisory From the American Heart Association. *Circulation*. 2020;141:e39-e53.
2. Spence JD. Fasting lipids: the carrot in the snowman. *Can J Cardiol*. 2003;19:890-892.
3. Alexander DD, Miller PE, Vargas AJ, Weed DL and Cohen SS. Meta-analysis of Egg Consumption and Risk of Coronary Heart Disease and Stroke. *J Am Coll Nutr*. 2016;35:704-716.
4. Qin C, Lv J, Guo Y, Bian Z, Si J, Yang L, Chen Y, Zhou Y, Zhang H, Liu J, Chen J, Chen Z, Yu C, Li L and China Kadoorie Biobank Collaborative G. Associations of egg consumption with cardiovascular disease in a cohort study of 0.5 million Chinese adults. *Heart*. 2018;104:1756-1763.
5. Abdollahi AM, Virtanen HEK, Voutilainen S, Kurl S, Tuomainen TP, Salonen JT and Virtanen JK. Egg consumption, cholesterol intake, and risk of incident stroke in men: the Kuopio Ischaemic Heart Disease Risk Factor Study. *Am J Clin Nutr*. 2019;110:169-176.
6. Dehghan M, Mente A, Rangarajan S, Mohan V, Lear S, Swaminathan S, Wielgosz A, Seron P, Avezum A, Lopez-Jaramillo P, Turbide G, Chifamba J, AlHabib KF, Mohammadifard N, Szuba A, Khatib R, Altuntas Y, Liu X, Iqbal R, Rosengren A, Yusuf R, Smuts M, Yusufali A, Li N, Diaz R, Yusoff K, Kaur M, Soman B, Ismail N, Gupta R, Dans A, Sheridan P, Teo K, Anand SS and Yusuf S. Association of egg intake with blood lipids, cardiovascular disease, and mortality in 177,000 people in 50 countries. *Am J Clin Nutr*. 2020;111:795-803.
7. Drouin-Chartier JP, Chen S, Li Y, Schwab AL, Stampfer MJ, Sacks FM, Rosner B, Willett WC, Hu FB and Bhupathiraju SN. Egg consumption and risk of cardiovascular disease: three large prospective US cohort studies, systematic review, and updated meta-analysis. *BMJ*. 2020;368:m513.
8. Spence JD and Jenkins D. Cardiovascular benefit of egg consumption is most unlikely. *Heart*. 2018;104:1805-1806.
9. Vernooij RWM, Zeraatkar D, Han MA, El Dib R, Zworh M, Milio K, Sit D, Lee Y, Goma H, Valli C, Swierz MJ, Chang Y, Hanna SE, Brauer PM, Sievenpiper J, de Souza R, Alonso-Coello P, Bala MM, Guyatt GH and Johnston BC. Patterns of Red and Processed Meat Consumption and Risk for Cardiometabolic and Cancer Outcomes: A Systematic Review and Meta-analysis of Cohort Studies. *Annals of Internal Medicine*. 2019;171:732-741.
10. Guyatt G, Oxman AD, Akl EA, Kunz R, Vist G, Brozek J, Norris S, Falck-Ytter Y, Glasziou P, DeBeer H, Jaeschke R, Rind D, Meerpohl J, Dahm P and Schunemann HJ. GRADE guidelines: 1. Introduction- GRADE evidence profiles and summary of findings tables. *J Clin Epidemiol*. 2011;64:383-94.
11. Willett W, Rockstrom J, Loken B, Springmann M, Lang T, Vermeulen S, Garnett T, Tilman D, DeClerck F, Wood A, Jonell M, Clark M, Gordon LJ, Fanzo J, Hawkes C, Zurayk R, Rivera JA, De Vries W, Majele Sibanda L, Afshin A, Chaudhary A, Herrero M, Agustina R, Branca F, Lartey A, Fan S, Crona B, Fox E, Bignet V, Troell M, Lindahl T, Singh S, Cornell SE, Srinath Reddy K, Narain S, Nishtar S and Murray CJL.

Food in the Anthropocene: the EAT-Lancet Commission on healthy diets from sustainable food systems. *Lancet*. 2019;393:447-492.

12. Guasch-Ferre M, Satija A, Blondin SA, Janiszewski M, Emlen E, O'Connor LE, Campbell WW, Hu FB, Willett WC and Stampfer MJ. Meta-Analysis of Randomized Controlled Trials of Red Meat Consumption in Comparison With Various Comparison Diets on Cardiovascular Risk Factors. *Circulation*. 2019;139:1828-1845.

13. Huang J, Liao LM, Weinstein SJ, Sinha R, Graubard BI and Albanes D. Association Between Plant and Animal Protein Intake and Overall and Cause-Specific Mortality. *JAMA Intern Med*. 2020;180:1173-1184.

14. Huang J, Liao LM, Weinstein SJ, Sinha R, Graubard BI and Albanes D. Association Between Plant and Animal Protein Intake and Overall and Cause-Specific Mortality. *JAMA Intern Med*. 2020;180:1173-1184.

15. Zheng Y, Li Y, Satija A, Pan A, Sotos-Prieto M, Rimm E, Willett WC and Hu FB. Association of changes in red meat consumption with total and cause specific mortality among US women and men: two prospective cohort studies. *BMJ*. 2019;365:2110.

16. Bernstein AM, Sun Q, Hu FB, Stampfer MJ, Manson JE and Willett WC. Major dietary protein sources and risk of coronary heart disease in women. *Circulation*. 2010;122:876-83.

17. Pan A, Sun Q, Bernstein AM, Schulze MB, Manson JE, Stampfer MJ, Willett WC and Hu FB. Red meat consumption and mortality: results from 2 prospective cohort studies. *Arch Intern Med*. 2012;172:555-63.

18. Kearns CE, Schmidt LA and Glantz SA. Sugar Industry and Coronary Heart Disease Research: A Historical Analysis of Internal Industry Documents. *JAMA Intern Med*. 2016;176:1680-1685.

19. Nestle M. Food Industry Funding of Nutrition Research: The Relevance of History for Current Debates. *JAMA Intern Med*. 2016;176:1685-1686.

20. Barnard ND, Long MB, Ferguson JM, Flores R and Kahleova H. Industry Funding and Cholesterol Research: A Systematic Review. *American Journal of Lifestyle Medicine*. 0:1559827619892198.

21. Greger M. Eggs vs. cigarettes in atherosclerosis. Accessed 05/20/2015 <http://nutritionfacts.org/video/eggs-vs-cigarettes-in-atherosclerosis/>. *Nutrition org*. 2014.

22. Greger M. False and Misleading Claims by Egg Marketers. Accessed 05/20/2015 <http://nutritionfacts.org/video/eggs-and-cholesterol-patently-false-and-misleading-claims/>. 2013.

23. Greger M. How the Egg Board Designs Misleading Studies. Accessed 05/20/2015 <http://nutritionfacts.org/video/how-the-egg-board-designs-misleading-studies/>. 2013;2015.

24. Greger M. Egg cholesterol in the diet. <http://nutritionfacts.org/video/egg-cholesterol-in-the-diet/> 2011; Accessed 2020 Jan 7.

25. Spence JD, Jenkins DJ and Davignon J. Dietary cholesterol and egg yolks: not for patients at risk of vascular disease. *Can J Cardiol*. 2010;26:e336-9.

26. Mente A, Dehghan M, Rangarajan S, McQueen M, Dagenais G, Wielgosz A, Lear S, Li W, Chen H, Yi S, et al. Association of dietary nutrients with blood lipids and blood pressure in 18 countries: a cross-sectional analysis from the PURE study. *Lancet Diabetes Endocrinol*. 2017;5:774-787.

27. Keys A and Parlin RW. Serum cholesterol response to changes in dietary lipids. *Am J Clin Nutr*. 1966;19:175-81.

28. Hegsted DM, McGandy RB, Myers ML and Stare FJ. Quantitative effects of dietary fat on serum cholesterol in man. *Am J Clin Nutr*. 1965;17:281-295.

29. Hegsted DM. Serum-cholesterol response to dietary cholesterol: a re-evaluation. *Am J Clin Nutr*. 1986;44:299-305.

30. Fielding CJ, Havel RJ, Todd KM, Yeo KE, Schloetter MC, Weinberg V and Frost PH. Effects of dietary cholesterol and fat saturation on plasma lipoproteins in an ethnically diverse population of healthy young men. *J Clin Invest*. 1995;95:611-618.
31. Nicholls SJ, Puri R, Anderson T, Ballantyne CM, Cho L, Kastelein JJ, Koenig W, Somaratne R, Kassahun H, Yang J, et al. Effect of Evolocumab on Progression of Coronary Disease in Statin-Treated Patients: The GLAGOV Randomized Clinical Trial. *JAMA*. 2016;316:2373-2384.
32. Spence JD and Solo K. Resistant Atherosclerosis: The Need for Monitoring of Plaque Burden. *Stroke*. 2017;48:1624-1629.
33. Sillesen H and Falk E. Why not screen for subclinical atherosclerosis? *Lancet*. 2011;378:645-6.
34. Bogiatzi C, Gloor G, Allen-Vercoe E, Reid G, Wong RG, Urquhart BL, Dinculescu V, Ruetz KN, Velenosi TJ, Pignanelli M and Spence JD. Metabolic products of the intestinal microbiome and extremes of atherosclerosis. *Atherosclerosis*. 2018;273:91-97.
35. Spence JD, Eliasziw M, DiCicco M, Hackam DG, Galil R and Lohmann T. Carotid Plaque Area: A Tool for Targeting and Evaluating Vascular Preventive Therapy. *Stroke*. 2002;33:2916-2922.
36. Spence JD. Red meat intake and cardiovascular risk: it's the events that matter; not the risk factors. *Journal of Public Health and Emergency*. 2017;1.
37. Schwab US, Ausman LM, Vogel S, Li Z, Lammi-Keefe CJ, Goldin BR, Ordovas JM, Schaefer EJ and Lichtenstein AH. Dietary cholesterol increases the susceptibility of low density lipoprotein to oxidative modification. *Atherosclerosis*. 2000;149:83-90.
38. Spence JD, Jenkins DJ and Davignon J. Dietary cholesterol and egg yolks: Not for patients at risk of vascular disease. *Can J Cardiol*. 2010;26:e336-e339.
39. Ghanim H, Abuaysheh S, Sia CL, Korzeniewski K, Chaudhuri A, Fernandez-Real JM and Dandona P. Increase in plasma endotoxin concentrations and the expression of Toll-like receptors and suppressor of cytokine signaling-3 in mononuclear cells after a high-fat, high-carbohydrate meal: implications for insulin resistance. *Diabetes Care*. 2009;32:2281-2287.
40. Kushi LH, Lew RA, Stare FJ, Ellison CR, el LM, Bourke G, Daly L, Graham I, Hickey N, Mulcahy R and . Diet and 20-year mortality from coronary heart disease. The Ireland-Boston Diet-Heart Study. *N Engl J Med*. 1985;312:811-818.
41. Shekelle RB, Shryock AM, Paul O, Lepper M, Stamler J, Liu S and Raynor WJ, Jr. Diet, serum cholesterol, and death from coronary heart disease. The Western Electric study. *N Engl J Med*. 1981;304:65-70.
42. Olson R, Casavale K, Rihane C, Stookey EE, Britten P, Reedy J, Rahavi R, de Jesus J, Piercy K, Mosher A, Fu S, Larson J and Brown Rodgers A. Dietary Guidelines for Americans 2015-2020. Eighth Edition. 2016.
43. Whoriskey P. Government revises Dietary Guidelines for Americans: Go ahead and have some eggs. [https://www.washingtonpost.com/news/wonk/wp/2016/01/07/government-revises-dietary-guidelines-for-americans-go-ahead-and-have-some-eggs/?utm\\_term=.c3a726ffa197](https://www.washingtonpost.com/news/wonk/wp/2016/01/07/government-revises-dietary-guidelines-for-americans-go-ahead-and-have-some-eggs/?utm_term=.c3a726ffa197). *Washington Post*. 2015; Accessed Dec 31, 2019.
44. Whoriskey P. The U.S. government is poised to withdraw longstanding warnings about cholesterol. <https://www.washingtonpost.com/news/wonk/wp/2015/02/10/feds-poised-to-withdraw-longstanding-warnings-about-dietary-cholesterol/?arc404=true>. 2015; Accessed Dec 31, 2019;2019.
45. Eggs can be part of a healthy diet. [https://www.health.harvard.edu/press\\_releases/eggs-can-be-part-of-a-healthy-diet](https://www.health.harvard.edu/press_releases/eggs-can-be-part-of-a-healthy-diet). 2015;Accessed 2019 Dec 31.
46. Hu FB, Stampfer MJ, Rimm EB, Manson JE, Ascherio A, Colditz GA, Rosner BA, Spiegelman D, Speizer FE, Sacks FM, et al. A prospective study of egg consumption and risk of cardiovascular disease in men and women. *JAMA*. 1999;281:1387-1394.

47. Qureshi AI, Suri FK, Ahmed S, Nasar A, Divani AA and Kirmani JF. Regular egg consumption does not increase the risk of stroke and cardiovascular diseases. *Med Sci Monit.* 2007;13:CR1-8.
48. Mozaffarian D, Benjamin EJ, Go AS, Arnett DK, Blaha MJ, Cushman M, de Ferranti S, Despres JP, Fullerton HJ, Howard VJ, et al. Heart disease and stroke statistics--2015 update: a report from the American Heart Association. *Circulation.* 2015;131:e29-322.
49. Rose G. Sick individuals and sick populations. *Int J Epidemiol.* 2001;30:427-432.
50. Willett WC, Sacks F, Trichopoulou A, Drescher G, Ferro-Luzzi A, Helsing E and Trichopoulos D. Mediterranean diet pyramid: a cultural model for healthy eating. *The American Journal of Clinical Nutrition.* 1995;61:1402S-1406S.
51. Trichopoulou A, Psaltopoulou T, Orfanos P and Trichopoulos D. Diet and physical activity in relation to overall mortality amongst adult diabetics in a general population cohort. *J Intern Med.* 2006;259:583-591.
52. Zhong VW, Van Horn L, Cornelis MC, Wilkins JT, Ning H, Carnethon MR, Greenland P, Mentz RJ, Tucker KL, Zhao L, et al. Associations of Dietary Cholesterol or Egg Consumption With Incident Cardiovascular Disease and Mortality. *JAMA.* 2019;321:1081-1095.
53. Zhong VW, Van Horn L, Greenland P, Carnethon MR, Ning H, Wilkins JT, Lloyd-Jones DM and Allen NB. Associations of Processed Meat, Unprocessed Red Meat, Poultry, or Fish Intake With Incident Cardiovascular Disease and All-Cause Mortality. *JAMA Intern Med.* 2020 Feb 3. [Epub ahead of print].
54. Argyridou S, Zaccardi F, Davies MJ, Khunti K and Yates T. Relevance of physical function in the association of red and processed meat intake with all-cause, cardiovascular, and cancer mortality. *Nutr Metab Cardiovasc Dis.* 2019;29:1308-1315.
55. Judd SE, Gutierrez OM, Newby PK, Howard G, Howard VJ, Locher JL, Kissela BM and Shikany JM. Dietary patterns are associated with incident stroke and contribute to excess risk of stroke in black Americans. *Stroke.* 2013;44:3305-11.
56. Lyskjaer L, Overvad K, Tjonneland A and Dahm CC. Substitutions of Oatmeal and Breakfast Food Alternatives and the Rate of Stroke. *Stroke.* 2020;51:75-81.
57. Wang Z, Klipfell E, Bennett BJ, Koeth R, Levison BS, Dugar B, Feldstein AE, Britt EB, Fu X, Chung YM, et al. Gut flora metabolism of phosphatidylcholine promotes cardiovascular disease. *Nature.* 2011;472:57-63.
58. Nutrition Center E. Nutrition facts Jumbo egg (63g) <https://www.eggnutritioncenter.org/content/uploads/2019/06/Jumbo-Egg-Label-vertical-format-mandatory-nutrients-1.pdf>. 2019;2019.
59. Rodionov RN, Dayoub H, Lynch CM, Wilson KM, Stevens JW, Murry DJ, Kimoto M, Arning E, Bottiglieri T, Cooke JP, et al. Overexpression of dimethylarginine dimethylaminohydrolase protects against cerebral vascular effects of hyperhomocysteinemia. *Circ Res.* 2010;106:551-558.
60. Tang WHW, Wang Z, Levinson BS, Koeth RA, Britt EB, Fu X, Wu Y and Hazen SL. Intestinal Microbiota Metabolism of Phosphatidylcholine and Cardiovascular Risk. *New England Journal of Medicine.* 2013;368:1575-1584.
61. Koeth RA, Wang Z, Levinson BS, Buffa JA, Org E, Sheehy BT, Britt EB, Fu X, Wu Y, Li L, et al. Intestinal microbiota metabolism of l-carnitine, a nutrient in red meat, promotes atherosclerosis. *Nat Med.* 2013;19:576-585.

62. Tang WH, Wang Z, Kennedy DJ, Wu Y, Buffa JA, Agatista-Boyle B, Li XS, Levison BS and Hazen SL. Gut microbiota-dependent trimethylamine N-oxide (TMAO) pathway contributes to both development of renal insufficiency and mortality risk in chronic kidney disease. *Circ Res*. 2015;116:448-455.
63. Miller CA, Corbin KD, da Costa KA, Zhang S, Zhao X, Galanko JA, Blevins T, Bennett BJ, O'Connor A and Zeisel SH. Effect of egg ingestion on trimethylamine-N-oxide production in humans: a randomized, controlled, dose-response study. *Am J Clin Nutr*. 2014;100:778-86.
64. Djousse L, Gaziano JM, Buring JE and Lee IM. Egg consumption and risk of type 2 diabetes in men and women. *Diabetes Care*. 2009;32:295-300.
65. Tamez M, Virtanen JK and Lajous M. Egg consumption and risk of incident type 2 diabetes: a dose-response meta-analysis of prospective cohort studies. *Br J Nutr*. 2016;115:2212-8.
66. Wallin A, Forouhi NG, Wolk A and Larsson SC. Egg consumption and risk of type 2 diabetes: a prospective study and dose-response meta-analysis. *Diabetologia*. 2016;59:1204-13.
67. Drouin-Chartier JP, Schwab AL, Chen S, Li Y, Sacks FM, Rosner B, Manson JE, Willett WC, Stampfer MJ, Hu FB and Bhupathiraju SN. Egg consumption and risk of type 2 diabetes: findings from 3 large US cohort studies of men and women and a systematic review and meta-analysis of prospective cohort studies. *Am J Clin Nutr*. 2020;112:619-630.
68. Wang Y, Li M and Shi Z. Higher egg consumption associated with increased risk of diabetes in Chinese adults - China Health and Nutrition Survey. *Br J Nutr*. 2020:1-8.
69. Wang Z, Bergeron N, Levison BS, Li XS, Chiu S, Jia X, Koeth RA, Li L, Wu Y, Tang WHW, et al. Impact of chronic dietary red meat, white meat, or non-meat protein on trimethylamine N-oxide metabolism and renal excretion in healthy men and women. *Eur Heart J*. 2019;40:583-594.
70. Kwok CS, Umar S, Myint PK, Mamas MA and Loke YK. Vegetarian diet, Seventh Day Adventists and risk of cardiovascular mortality: a systematic review and meta-analysis. *Int J Cardiol*. 2014;176:680-6.
71. Satija A, Bhupathiraju SN, Spiegelman D, Chiuve SE, Manson JE, Willett W, Rexrode KM, Rimm EB and Hu FB. Healthful and Unhealthful Plant-Based Diets and the Risk of Coronary Heart Disease in U.S. Adults. *J Am Coll Cardiol*. 2017;70:411-422.
72. Spence JD and Tangney C. Lower risk of stroke with a vegetarian diet. *Neurology*. 2020;94:463-464.
73. Naghshi S, Sadeghi O, Willett WC and Esmailzadeh A. Dietary intake of total, animal, and plant proteins and risk of all cause, cardiovascular, and cancer mortality: systematic review and dose-response meta-analysis of prospective cohort studies. *BMJ*. 2020;370:m2412.
74. Kim H, Caulfield LE, Garcia-Larsen V, Steffen LM, Coresh J and Rebholz CM. Plant-Based Diets Are Associated With a Lower Risk of Incident Cardiovascular Disease, Cardiovascular Disease Mortality, and All-Cause Mortality in a General Population of Middle-Aged Adults. *J Am Heart Assoc* 2019;8:e012865. doi: 10.1161/JAHA.119.012865.
75. Spence JD. Effects of the intestinal microbiome on constituents of red meat and egg yolks: a new window opens on nutrition and cardiovascular disease. *Can J Cardiol*. 2014;30:150-151.
76. Poesen R, Claes K, Evenepoel P, de Loor H, Augustijns P, Kuypers D and Meijers B. Microbiota-Derived Phenylacetylglutamine Associates with Overall Mortality and Cardiovascular Disease in Patients with CKD. *J Am Soc Nephrol*. 2016;27:3479-3487.
77. Nemet I, Saha PP, Gupta N, Zhu W, Romano KA, Skye SM, Cajka T, Mohan ML, Li L, Wu Y, et al. A Cardiovascular Disease-Linked Gut Microbial Metabolite Acts via Adrenergic Receptors. *Cell*. 2020;180:862-877 e22.
78. Seline K-G and Johein H. The determination of L-carnitine in several food samples. 2007; 105 793– 804.

79. Pignanelli M, Bogiatzi C, Gloor G, Allen-Vercoe E, Reid G, Urquhart BL, Ruetz KN, Velenosi TJ and Spence JD. Moderate Renal Impairment and Toxic Metabolites Produced by the Intestinal Microbiome: Dietary Implications. *J Ren Nutr.* 2019;29:55-64.
80. Gryp T, Vanholder R, Vanechoutte M and Glorieux G. p-Cresyl Sulfate. *Toxins (Basel).* 2017;9.
81. Al-Shaar L, Satija A, Wang DD, Rimm EB, Smith-Warner SA, Stampfer MJ, Hu FB and Willett WC. Red meat intake and risk of coronary heart disease among US men: prospective cohort study. *BMJ.* 2020;371:m4141.
82. Sirich TL, Funk BA, Plummer NS, Hostetter TH and Meyer TW. Prominent accumulation in hemodialysis patients of solutes normally cleared by tubular secretion. *J Am Soc Nephrol.* 2014;25:615-22.
83. Spence JD, Urquhart BL and Bang H. Effect of renal impairment on atherosclerosis: only partially mediated by homocysteine. *Nephrol Dial Transplant.* 2016;31:937-44.
84. Shan Z, Guo Y, Hu FB, Liu L and Qi Q. Association of Low-Carbohydrate and Low-Fat Diets With Mortality Among US Adults. *JAMA Intern Med.* 2020;180:1090-1100.
85. Dehghan M, Mente A, Zhang X, Swaminathan S, Li W, Mohan V, Iqbal R, Kumar R, Wentzel-Viljoen E, Rosengren A, et al. Associations of fats and carbohydrate intake with cardiovascular disease and mortality in 18 countries from five continents (PURE): a prospective cohort study. *Lancet.* 2017;390:2050-2062.
86. Schwingshackl L, Watzl B and Meerpohl JJ. The healthiness and sustainability of food based dietary guidelines. *BMJ.* 2020;370:m2417.
87. Willett WC and Stampfer MJ. Rebuilding the food pyramid. *Sci Am.* 2003;288:64-71.
88. Puska P, Vartiainen E, Tuomilehto J, Salomaa V and Nissinen A. Changes in premature deaths in Finland: successful long-term prevention of cardiovascular diseases. *Bull World Health Organ.* 1998;76:419-25.
89. Shan Z, Li Y, Baden MY, Bhupathiraju SN, Wang DD, Sun Q, Rexrode KM, Rimm EB, Qi L, Willett WC, et al. Association Between Healthy Eating Patterns and Risk of Cardiovascular Disease. *JAMA Internal Medicine.* 2020;180:1090-1100.
90. Keys A. Mediterranean diet and public health: personal reflections. *Am J Clin Nutr.* 1995;61:1321S-1323S.
91. Shai I, Schwarzfuchs D, Henkin Y, Shahar DR, Witkow S, Greenberg I, Golan R, Fraser D, Bolotin A, Vardi H, et al. Weight loss with a low-carbohydrate, Mediterranean, or low-fat diet. *N Engl J Med.* 2008;359:229-241.
92. Hu Y, Ding M, Sampson L, Willett WC, Manson JE, Wang M, Rosner B, Hu FB and Sun Q. Intake of whole grain foods and risk of type 2 diabetes: results from three prospective cohort studies. *BMJ.* 2020;370:m2206.
93. Renaud S, de Lorgeril M, Delaye J, Guidollet J, Jacquard F, Mamelle N, Martin JL, Monjaud I, Salen P and Toubol P. Cretan Mediterranean diet for prevention of coronary heart disease. *Am J Clin Nutr.* 1995;61:1360S-1367S.
94. Group" SSSS. Randomized trial of cholesterol lowering in 4,444 patients with coronary heart disease: the Scandinavian Simvastatin Survival Study (4S). *Lancet.* 1994;344:1383-1389.
95. Martinez-Gonzalez MA, Ros E and Estruch R. Primary Prevention of Cardiovascular Disease with a Mediterranean Diet Supplemented with Extra-Virgin Olive Oil or Nuts. *N Engl J Med.* 2018;379:1388-1389.

96. Estruch R, Ros E, Salas-Salvado J, Covas MI, Corella D, Aros F, Gomez-Gracia E, Ruiz-Gutierrez V, Fiol M, Lapetra J, et al. Primary Prevention of Cardiovascular Disease with a Mediterranean Diet Supplemented with Extra-Virgin Olive Oil or Nuts. *N Engl J Med*. 2018;378:e34.
97. Babio N, Toledo E, Estruch R, Ros E, Martinez-Gonzalez MA, Castaner O, Bullo M, Corella D, Aros F, Gomez-Gracia E, et al. Mediterranean diets and metabolic syndrome status in the PREDIMED randomized trial. *CMAJ*. 2014;186:E649-E657.
98. Hachinski V, Einhaupl K, Ganten D, Alladi S, Brayne C, Stephan BCM, Sweeney MD, Zlokovic B, Iturria-Medina Y, Iadecola C, et al. Preventing dementia by preventing stroke: The Berlin Manifesto. *Alzheimers Dement*. 2019;15:961-984.
99. Spence JD. Homocysteine Lowering with B Vitamins for Stroke Prevention—A History. *US Neurology*. 2018;14:35-39.
100. Brookmeyer R, Gray S and Kawas C. Projections of Alzheimer's disease in the United States and the public health impact of delaying disease onset. *Am J Public Health*. 1998;88:1337-42.
101. Valls-Pedret C, Sala-Vila A, Serra-Mir M, Corella D, de la Torre R, Martinez-Gonzalez MA, Martinez-Lapiscina EH, Fito M, Perez-Heras A, Salas-Salvado J, et al. Mediterranean Diet and Age-Related Cognitive Decline: A Randomized Clinical Trial. *JAMA Intern Med*. 2015;175:1094-103.
102. Spence JD. Diet for stroke prevention. *Stroke & Vascular Neurology*. 2018;2018;0: e000130. 0.
103. Jenkins W, Jenkins A, Jenkins A and Brydson C. *The Portfolio Diet for Cardiovascular Disease Risk Reduction. An Evidence Based Approach to Lower Cholesterol through Plant Food Consumption*. 1st ed: AcademicPress, Elsevier; 2019.
